# Supplementary material for: Phase IB Study of GITR Agonist Antibody TRX518 Singly and in Combination with Gemcitabine, Pembrolizumab, or Nivolumab in Patients with Advanced Solid Tumors
Source: Oxford University Press journal article supplement (doi:10.1158/1078-0432.ccr-22-0339), 2022-05-02
Supplement: ccr-22-0339_supplementary_figure_1_supps1.docx [file ccr-22-0339_supplementary_figure_1_supps1.docx]

**Supplementary Methods, Figures and Tables**

**Supplementary Figure 1: Pharmacokinetic profile of TRX518 following intravenous administration**

**Supplementary Figure 1 │ Pharmacokinetic profile of TRX518 following intravenous administration.**

Blood samples for TRX518 PK assessment were collected pre- and post-dose and 1-, 2-, 4- and 8-hours as described in **Methods**, and serum TRX518 levels were measured using a validated ELISA. Patients were analyzed by TRX518 dose level (1 mg/kg Q1W vs. 2 mg/kg Q1W vs. 4 mg/kg Q1W vs. 2 mg/kg load and 4 mg/kg load).
