# Supplementary material for: Phase IB Study of GITR Agonist Antibody TRX518 Singly and in Combination with Gemcitabine, Pembrolizumab, or Nivolumab in Patients with Advanced Solid Tumors
Source: Oxford University Press journal article supplement (doi:10.1158/1078-0432.ccr-22-0339), 2022-05-02
Supplement: ccr-22-0339_supplementary_table_4_suppts4.docx [file ccr-22-0339_supplementary_table_4_suppts4.docx]

**Supplementary Table 4: Non-compartmental PK analysis.**

Comparison of Cmax (mg/kg)

| **Group** | **n** | **mean** | **SD** | **Median** | **Inter-quartile range** | **p-value with the Wilcoxon rank sum test** |
| --- | --- | --- | --- | --- | --- | --- |
| 2 mg/kg load | 18 | 43780.1 | 8658.1 | 46038.5 | 37794.0-52477.0 | <0.0001 |
| 4 mg/kg load | 66 | 88039.4 | 21712.6 | 85596.5 | 72405.0-98604.0 |

Comparison of half-life T1/2 (day)

| **Group** | **n** | **mean** | **SD** | **Median** | **Inter-quartile range** | **p-value with the Wilcoxon rank sum test** |
| --- | --- | --- | --- | --- | --- | --- |
| 2 mg/kg load | 18 | 29.9 | 34.4 | 15.9 | 9.1-30.5 | 0.7404 |
| 4 mg/kg load | 66 | 41.7 | 77.6 | 18.9 | 10.2-40.8 |

- 1. Comparison of AUC7 (i.e., AUC between day 0 and day 7)

| **Group** | **n** | **mean** | **SD** | **Median** | **Inter-quartile range** | **p-value with the Wilcoxon rank sum test** |
| --- | --- | --- | --- | --- | --- | --- |
| 2 mg/kg load | 18 | 256,861.4 | 379,131.1 | 165,783.4 | 145,188.8-198,572.9 | <0.0001 |
| 4 mg/kg load | 66 | 415,768.4 | 280,598.9 | 352,737.2 | 289,558.8-451064.8 |

Comparison of AUC14 (i.e., AUC between day 0 and day 14)

| **Group** | **n** | **mean** | **SD** | **Median** | **Inter-quartile range** | **p-value with the Wilcoxon rank sum test** |
| --- | --- | --- | --- | --- | --- | --- |
| 2 mg/kg load | 18 | 609,877.1 | 1,509,257.8 | 252,708.2 | 216,227.5-303,371.4 | <0.0001 |
| 4 mg/kg load | 66 | 781,701.6 | 1,019,317.2 | 518,470.0 | 433,940.2-686,735.2 |

Comparison of AUC21 (i.e., AUC between day 0 and day 21)

| **Group** | **n** | **mean** | **SD** | **Median** | **Inter-quartile range** | **p-value with the Wilcoxon rank sum test** |
| --- | --- | --- | --- | --- | --- | --- |
| 2 mg/kg load | 18 | 1,147,762.8 | 3,370,433.7 | 376,703.1 | 274,347.1-428,180.2 | <0.0001 |
| 4 mg/kg load | 66 | 1,209,421.7 | 2,179,332.4 | 700,160.3 | 532,696.3-878,095.3 |

Comparison of AUC28 (i.e., AUC between day 0 and day 28)

| **Group** | **n** | **mean** | **SD** | **Median** | **Inter-quartile range** | **p-value with the Wilcoxon rank sum test** |
| --- | --- | --- | --- | --- | --- | --- |
| 2 mg/kg load | 18 | 1,852,301.6 | 5,966,860.8 | 442,876.8 | 346,381.6-564,013.9 | <0.0001 |
| 4 mg/kg load | 66 | 1,719,809.7 | 3,767,384.7 | 850,032.7 | 610,447.4-1,053,289.9 |

For all the above parameters, mean value is not reliable as it could be affected by outliers. Median and interquartile range are more reliable, and the tests were based on them.
