# Supplementary material for: Phase IB Study of GITR Agonist Antibody TRX518 Singly and in Combination with Gemcitabine, Pembrolizumab, or Nivolumab in Patients with Advanced Solid Tumors
Source: Oxford University Press journal article supplement (doi:10.1158/1078-0432.ccr-22-0339), 2022-05-02
Supplement: ccr-22-0339_supplementary_table_5_suppts5.docx [file ccr-22-0339_supplementary_table_5_suppts5.docx]

**Supplementary Table 5: Patients with available samples for immune pharmacodynamic assessments.**

| **Patient ID** | **Treatment** | **Type of Cancer (Primary Diagnosis)** | **FC in longitudinal PBMC samples** | **IF staining for Tregs** | **IF staining for CD8** | **IF staining for GzmB** | **Target response - best RECIST v1.1** | **PFS (days)** |
| --- | --- | --- | --- | --- | --- | --- | --- | --- |
| 71220029 | Part A Cohort5+Part B | Melanoma | yes | yes | yes | yes | PD | 32 |
| 71220033 | Part A Cohort5+Part B | Other | yes | no | no | no | SD | 81 |
| 71220045 | Part A Cohort5+Part B | Rectal | yes | yes | yes | yes | SD | 81 |
| 71220048 | Part A Cohort5+Part B | Breast | yes | yes | yes | yes | SD | 82 |
| 71220049 | Part A Cohort5+Part B | Colon | yes | no | no | no | SD | 82 |
| 71220050 | Part A Cohort5+Part B | Kidney | yes | no | no | no | SD | 79 |
| 71220056 | Part A Cohort5+Part B | Melanoma | yes | no | no | no | SD | 124 |
| 71220063 | Part A Cohort5+Part B | Breast | yes | no | no | no | SD | 82 |
| 91370031 | Part A Cohort5+Part B | Prostate | yes | no | no | no | SD | 187 |
| 91370039 | Part A Cohort5+Part B | Rectal | yes | yes | yes | no | PD | 40 |
| 91370053 | Part A Cohort5+Part B | Prostate | yes | yes | yes | no | NE | 0 |
| 91920032 | Part A Cohort5+Part B | NSCLC | no | yes | yes | yes | NE | 30 |
| 91920042 | Part A Cohort5+Part B | Prostate | yes | yes | yes | yes | PD | 47 |
| 91920060 | Part A Cohort5+Part B | Colon | yes | no | yes | yes | SD | 85 |
| 91920062 | Part A Cohort5+Part B | Lung | yes | yes | yes | no | SD | 84 |
| 93490044 | Part A Cohort5+Part B | Colon | yes | yes | yes | yes | SD | 140 |
| 93490052 | Part A Cohort5+Part B | Ovarian | yes | no | no | no | PD | 36 |
| 93490061 | Part A Cohort5+Part B | Uterus | yes | yes | yes | yes | PD | 41 |
| 30000036 | Part A Cohort5+Part B | Colorectal | no | yes | yes | yes | SD | 175 |
| 30000037 | Part A Cohort5+Part B | Ovarian | no | yes | yes | yes (n.a) | SD | 86 |
| 30000038 | Part A Cohort5+Part B | HCC | no | yes | yes | yes | PR | 685 |
| 30000067 | Part C (TRX518+Gem) | Endometrial | yes | no | no | no | NE | 19 |
| 30000089 | Part C (TRX518+Gem) | Pancreatic | yes | yes | yes | no | SD | 97 |
| 30000095 | Part C (TRX518+Gem) | Ovarian | yes | yes | yes | no | SD | 114 |
| 30000099 | Part C (TRX518+Gem) | Appendiceal | yes | yes | yes | no | SD | 246 |
| 30000107 | Part C (TRX518+Gem) | Pancreatic | yes | yes | yes | no | SD | 260 |
| 30000108 | Part C (TRX518+Gem) | Pancreatic | yes | yes | yes | no | PD | 82 |
| 30000115 | Part C (TRX518+Gem) | Breast | yes | yes | yes | no | PD | 49 |
| 30000116 | Part C (TRX518+Gem) | Cholangio | yes | yes | yes | no | SD | 154 |
| 30000118 | Part C (TRX518+Gem) | Cholangio | yes | yes | yes | no | SD | 182 |
| 30000120 | Part C (TRX518+Gem) | Ovarian | yes | yes | yes | no | SD | 134 |
| 71220078 | Part C (TRX518+Gem) | Pancreatic | yes | no | no | no | NE | 0 |
| 71220083 | Part C (TRX518+Gem) | Pancreatic | yes | yes | yes | no | NE | 0 |
| 71220098 | Part C (TRX518+Gem) | Pancreatic | yes | yes | yes | no | SD | 81 |
| 71220110 | Part C (TRX518+Gem) | Cholangio | yes | yes | yes | no | SD | 131 |
| 71220124 | Part C (TRX518+Gem) | Pancreatic | yes | no | no | no | PD | 44 |
| 71220127 | Part C (TRX518+Gem) | Pancreatic | yes | no | no | no | PD | 37 |
| 71220128 | Part C (TRX518+Gem) | Pancreatic | yes | yes | yes | no | PD | 37 |
| 91370084 | Part C (TRX518+Gem) | Gallbladder | yes | yes | yes | no | SD | 217 |
| 91370087 | Part C (TRX518+Gem) | Pancreatic | yes | yes | yes | no | PR | 428 |
| 91370093 | Part C (TRX518+Gem) | Pancreatic | yes | yes | yes | no | PD | 39 |
| 91370105 | Part C (TRX518+Gem) | Pancreatic | yes | yes | yes | no | SD | 87 |
| 91550069 | Part C (TRX518+Gem) | Testicular | yes | yes | yes | no | PD | 41 |
| 91550100 | Part C (TRX518+Gem) | Pancreatic | yes | no | no | no | SD | 41 |
| 91550101 | Part C (TRX518+Gem) | Thymic | yes | no | no | no | SD | 30 |
| 91550106 | Part C (TRX518+Gem) | Cholangio | yes | yes | yes | no | PD | 43 |
| 91550112 | Part C (TRX518+Gem) | Mesothelioma | yes | yes | yes | no | SD | 238 |
| 91550113 | Part C (TRX518+Gem) | Mesothelioma | yes | no | no | no | NE | 43 |
| 91920104 | Part C (TRX518+Gem) | RCCA | yes | no | no | no | PD | 42 |
| 91920126 | Part C (TRX518+Gem) | soft tissue sarcoma | yes | yes | yes | no | PD | 49 |
| 93490073 | Part C (TRX518+Gem) | Pancreatic | yes | yes | yes | no | PD | 40 |
| 30000092 | Part D (TRX518+pembro) | squamous esophageal cancer | yes | yes | yes | yes | CR | 446 |
| 93490072 | Part D (TRX518+pembro) | melanoma | no | yes | yes | yes | PD | 42 |
| 71220077 | Part D (TRX518+pembro) | urothelial carcinoma | no | yes | no | no | PD | 39 |
| 71220082 | Part D (TRX518+pembro) | urothelial carcinoma | no | yes | yes | yes | PD | 36 |
| 93490091 | Part D (TRX518+pembro) | ocular melanoma | no | yes | yes | yes | SD | 174 |
| 30000066 | Part E (TRX518+nivo) | papillary RCCA | yes | yes | yes | yes | SD | 83 |
| 30000076 | Part E (TRX518+nivo) | clear cell RCCA | yes | yes | no | no | PD | 55 |
| 30000088 | Part E (TRX518+nivo) | SCCHN | yes | no | no | no | NE | 54 |
| 71220094 | Part E (TRX518+nivo) | urothelial carcinoma | no | yes | yes | yes | PR | 162 |
| 30000103 | Part E (TRX518+nivo) | adenoca of unknown primary | no | yes | yes | yes | PD | 79 |
| **Abbreviations:** NSCLC, non-small cell lung cancer; HCC, hepatocellular carcinoma; RCCA, renal cell carcinoma; SCCHN, Squamous cell carcinoma of head and neck; n.a., non assessable. | | | | | | | | |
